# Supplementary material for: Influenza returns with a season dominated by clade 3C.2a1b.2a.2 A(H3N2) viruses, WHO European Region, 2021/22
Source: PubMed Central journal article supplement (PMC9012087; doi:10.2807/1560-7917.es.2022.27.15.2200255), 2022-04-14
Supplement: 2200255_Supplement1.pdf [file 2200255_Supplement1.pdf]

This supplementary material is hosted by *Eurosurveillance* as supporting information alongside the article 'Influenza returns with a season dominated by clade 3C.2a1b.2a.2 A(H3N2) viruses, WHO European Region, 2021/22' on behalf of the authors who remain responsible for the accuracy and appropriateness of the content. The same standards for ethics, copyright, attributions and permissions as for the article apply. Supplements are not edited by Eurosurveillance and the journal is not responsible for the maintenance of any links or email addresses provided therein.

## S1. Influenza Season in the WHO European Region: weeks 40/2021-10/2022, 40/2020-10/2021, 40/2019-10/2020

| Virus type/subtype/lineage | Cumulative number of detections for weeks 40/2021-10/2022 |                      |                      |             |               | Cumulative number of detections for weeks 40/2020-10/2021 |                      |                    |             |            | Cumulative number of detections for weeks 40/2019-10/2020 |                      |                    |             |               |
|----------------------------|-----------------------------------------------------------|----------------------|----------------------|-------------|---------------|-----------------------------------------------------------|----------------------|--------------------|-------------|------------|-----------------------------------------------------------|----------------------|--------------------|-------------|---------------|
|                            | Sentinel sources                                          | Non-sentinel sources | Totals               | %           | Ratios        | Sentinel sources                                          | Non-sentinel sources | Totals             | %           | Ratios     | Sentinel sources                                          | Non-sentinel sources | Totals             | %           | Ratios        |
| <b>Influenza A</b>         | <b>3045</b>                                               | <b>50401</b>         | <b>53446</b>         | <b>97.1</b> | <b>33.3:1</b> | <b>21</b>                                                 | <b>347</b>           | <b>368</b>         | <b>50.6</b> | <b>1:1</b> | <b>10671</b>                                              | <b>99729</b>         | <b>110400</b>      | <b>74.3</b> | <b>2.9:1</b>  |
| A(H1N1)pdm09               | 173                                                       | 1232                 | 1405                 | 7.6         |               | 13                                                        | 28                   | 41                 | 48.2        |            | 5939                                                      | 17508                | 23445              | 55.1        |               |
| A(H3N2)                    | 2094                                                      | 15002                | 17098                | 92.4        | 12.2:1        | 6                                                         | 38                   | 44                 | 51.8        | 1.1:1      | 3933                                                      | 15154                | 19087              | 44.9        | 0.8:1         |
| A not subtyped             | 778                                                       | 34167                | 34945                |             |               | 2                                                         | 281                  | 283                |             |            | 899                                                       | 66969                | 67868              |             |               |
| <b>Influenza B</b>         | <b>38</b>                                                 | <b>1565</b>          | <b>1603</b>          | <b>2.9</b>  |               | <b>14</b>                                                 | <b>345</b>           | <b>359</b>         | <b>49.4</b> | <b>4:1</b> | <b>5709</b>                                               | <b>32423</b>         | <b>38132</b>       | <b>25.7</b> | <b>48.1:1</b> |
| Victoria lineage           | 6                                                         | 16                   | 22                   | 100.0       |               | 1                                                         | 7                    | 8                  | 80.0        |            | 2142                                                      | 1708                 | 3850               | 98.0        |               |
| Yamagata lineage           | 0                                                         | 0                    | 0                    |             |               | 0                                                         | 2                    | 2                  | 20.0        |            | 21                                                        | 59                   | 80                 | 2.0         |               |
| Lineage not ascribed       | 32                                                        | 1549                 | 1581                 |             |               | 13                                                        | 341                  | 354                |             |            | 3546                                                      | 30656                | 34202              |             |               |
| <b>Total detections</b>    | <b>3 083</b>                                              | <b>51 966</b>        | <b>55 049</b>        |             |               | <b>35</b>                                                 | <b>692</b>           | <b>727</b>         |             |            | <b>16 380</b>                                             | <b>132 152</b>       | <b>148 532</b>     |             |               |
| <b>Total tested</b>        | <b>39 551</b>                                             | <b>&gt;1 849 356</b> | <b>&gt;1 888 907</b> |             |               | <b>27 779</b>                                             | <b>&gt;454 125</b>   | <b>&gt;481 904</b> |             |            | <b>44 090</b>                                             | <b>&gt;587 319</b>   | <b>&gt;631 409</b> |             |               |
| Sentinel % positive        | 7.8                                                       |                      |                      |             |               | 0.1                                                       |                      |                    |             |            | 37.2                                                      |                      |                    |             |               |
| % Total detections         | 5.6                                                       | 94.4                 |                      |             |               | 4.8                                                       | 95.2                 |                    |             |            | 11.0                                                      | 89.0                 |                    |             |               |

<sup>a</sup> Numbers taken from Flu News Europe to week 10/2022, week 10/2021 and 10/2020 reports for the three influenza seasons

\* Percentages are shown for total detections (types A & B [in bold type], and for viruses ascribed to influenza A subtype and influenza B lineage). Ratios are given for type A:B [in bold type], A(H3N2):A(H1N1)pdm09 and Victoria:Yamagata lineages.
